# Supplementary material
Source: bioRxiv or medRxiv preprint supplement (https://www.biorxiv.org/highwire/filestream/125689/field_highwire_adjunct_files/4/416701-4.pdf)
Supplement: Supplementary file [file 416701-4.pdf]

| Probe    | Target                                          | Formamide | Reference |
|----------|-------------------------------------------------|-----------|-----------|
| Cla6192  | <i>Nitrosomonas</i> cluster 6                   | 35%       | (1)       |
| NEU      | <i>Nitrosomonas halophila/eutropha/europaea</i> | 40%       | (2)       |
| Ntspa662 | <i>Nitrospira</i>                               | 35%       | (3)       |
| Ntoga122 | <i>Nitrotoga</i>                                | 40%       | (4)       |
| AMX820   | <i>Brocadia</i> and <i>Kuenenia</i>             | 40%       | (5)       |

## References

1. Adamczyk J, Hesselsoe M, Iversen N, Horn M, Lehner A, Nielsen PH, Schloter M, Roslev P, Wagner M. 2003. The Isotope Array, a New Tool That Employs Substrate-Mediated Labeling of rRNA for Determination of Microbial Community Structure and Function. *Applied and Environmental Microbiology* 69:6875-6887.
2. Wagner M, Rath G, Amann R, Koops H-P, Schleifer K-H. 1995. In situ Identification of Ammonia-oxidizing Bacteria. *Systematic and Applied Microbiology* 18:251-264.
3. Daims H, Nielsen JL, Nielsen PH, Schleifer K-H, Wagner M. 2001. In Situ Characterization of Nitrospira-Like Nitrite-Oxidizing Bacteria Active in Wastewater Treatment Plants. *Applied and Environmental Microbiology* 67:5273-5284.
4. Lückner S, Schwarz J, Gruber-Dorninger C, Spieck E, Wagner M, Daims H. 2014. Nitrotoga-like bacteria are previously unrecognized key nitrite oxidizers in full-scale wastewater treatment plants. *The ISME Journal* 9:708.
5. Schmid M, Schmitz-Esser S, Jetten M, Wagner M. 2001. 16S-23S rDNA intergenic spacer and 23S rDNA of anaerobic ammonium-oxidizing bacteria: implications for phylogeny and in situ detection. *Environmental Microbiology* 3:450-459.
